# Supplementary material for: Drug repurposing as a potential source of innovative therapies in cervical cancer
Source: PubMed Central journal article supplement — Int J Gynecol Cancer. 2022 Sep 22;32(11):1377–86. doi: 10.1136/ijgc-2022-003585 (PMC9664115; doi:10.1136/ijgc-2022-003585), 2022-09-22
Supplement: ijgc-2022-003585supp001.pdf [file ijgc-2022-003585supp001.pdf]

## SUPPLEMENTARY MATERIAL

TABLE S1: All drugs included in the ReDO\_DB and CDcervix\_DB

| ReDO_DB                    |                   | CDcervix_DB         |                       |
|----------------------------|-------------------|---------------------|-----------------------|
| Acetaminophen              | Loperamide        | Abemaciclib         | Ixazomib              |
| Acetazolamide              | Lopinavir         | Abiraterone         | Lanreotide            |
| Acetylsalicylic acid       | Loratadine        | Acalabrutinib       | Lapatinib             |
| Adapalene                  | Losartan          | Afatinib            | Larotrectinib         |
| Ademetionine               | Lovastatin        | Aflibercept         | Lenalidomide          |
| Agomelatine                | Loxoprofen        | Aldesleukin         | Lenvatinib            |
| Albendazole                | Macitentan        | Alectinib           | Letrozole             |
| Alendronic acid            | Manipine          | Alemtuzumab         | Leuprolide            |
| Aliskiren                  | Maraviroc         | Alitretinoin        | Lomustine             |
| Allopurinol                | Mebendazole       | Alpelisib           | Lorlatinib            |
| Alpha-lipoic acid          | Meclizine         | Altretamine         | Lu 177-dotatate       |
| Amantadine                 | Meclofenamate     | Aminolevulinic acid | Lurbinectedin         |
| Amiloride                  | Mefenamic acid    | Amsacrine           | Medroxyprogesterone   |
| Aminophylline              | Mefloquine        | Anastrozole         | Megestrol             |
| Amiodarone                 | Megestrol acetate | Apalutamide         | Melphalan             |
| Amitriptyline              | Melatonin         | Arsenic trioxide    | Mercaptopurine        |
| Amlodipine                 | Meloxicam         | Asparaginase        | Midostaurin           |
| Amodiaquine                | Memantine         | Avapritinib         | Mifamurtide           |
| Anagrelide                 | Menatetrenone     | Axicabtagene        | Mitoxantrone          |
| Anakinra                   | Mepacrine         | Axitinib            | Mogamulizumab         |
| Aprepitant                 | Mepyramine        | Azacitidine         | Moxetumomab           |
| Aprotinin                  | Mesalazine        | BCG vaccine         | Necitumumab           |
| Argatroban                 | Metformin         | Belantamab          | Nelarabine            |
| Aripiprazole               | Methazolamide     | Belinostat          | Neratinib             |
| Artesunate                 | Methimazole       | Belotecan           | Nilotinib             |
| Ascorbic acid              | Methylene blue    | Bendamustine        | Nilutamide            |
| Atenolol                   | Methylnaltrexone  | Bexarotene          | Nintedanib            |
| Atorvastatin               | Metoclopramide    | Bicalutamide        | Niraparib             |
| Atovaquone                 | Metyrapone        | Binimetinib         | Obinutuzumab          |
| Atrial natriuretic peptide | Miconazole        | Blinatumomab        | Ofatumumab            |
| Auranofin                  | Midazolam         | Bortezomib          | Olaparib              |
| Azelastine                 | Mifepristone      | Bosutinib           | Olaratumab            |
| Azithromycin               | Miltefosine       | Brentuximab         | Omacetaxine           |
| Bazedoxifene               | Minocycline       | Brexucabtagene      | Osimertinib           |
| Bedaquiline                | Mirtazapine       | Brigatinib          | Padeliporfin          |
| Bemiparin                  | Mometasone        | Buserelin           | Palbociclib           |
| Benserazide                | Montelukast       | Busulfan            | Panitumumab           |
| Benzatropine               | Mycophenolate     | Cabazitaxel         | Panobinostat          |
| Bepiridil                  | Nadroparin        | Cabozantinib        | Pazopanib             |
| Bezafibrate                | Naftopidil        | Calaspargase pegol  | Pegaspargase          |
| Biperiden                  | Naltrexone        | Capmatinib          | Peginterferon alfa-2b |
| Bosentan                   | Naproxen          | Carfilzomib         | Pemigatinib           |
| Brexipiprazole             | Nelfinavir        | Carmofur            | Pentostatin           |

|                 |                  |                 |                         |
|-----------------|------------------|-----------------|-------------------------|
| Bromocriptine   | Niclosamide      | Carmustine      | Pertuzumab              |
| Cabergoline     | Nicotinamide     | Ceritinib       | Pipobroman              |
| Caffeine        | Nifedipine       | Cetuximab       | Pixantrone              |
| Calcipotriol    | Nifuroxazide     | Chlorambucil    | Plicamycin              |
| Calcitriol      | Nifurtimox       | Chlormethine    | Polatuzumab             |
| Canagliflozin   | Nimesulide       | Cladribine      | Polyestradiol phosphate |
| Candesartan     | Nimodipine       | Clofarabine     | Pomalidomide            |
| Captopril       | Nisoldipine      | Cobimetinib     | Ponatinib               |
| Carbimazole     | Nitazoxanide     | Copanlisib      | Porfimer                |
| Carglumic acid  | Nitisinone       | Crizotinib      | Pralatrexate            |
| Carvedilol      | Nitroglycerin    | Cytarabine      | Pralsetinib             |
| Celecoxib       | Nitroxoline      | Dabrafenib      | Prednisolone            |
| Cephalexin      | Norethandrolone  | Dacarbazine     | Prednisone              |
| Chloramphenicol | Noscapine        | Dacomitinib     | Procabazine             |
| Chloroquine     | Obeticholic acid | Dactinomycin    | Racotumomab             |
| Chlorpromazine  | Olanzapine       | Daratumumab     | Radium 223 dichloride   |
| Cholecalciferol | Olmesartan       | Darolutamide    | Ramucirumab             |
| Cholera vaccine | Olsalazine       | Dasatinib       | Ranimustine             |
| Ciclopirox      | Omega 3          | Decitabine      | Regorafenib             |
| Cidofovir       | Omeprazole       | Degarelix       | Ribociclib              |
| Cilnidipine     | Orlistat         | Denileukin      | Ripretinib              |
| Cimetidine      | Ormeloxifene     | Denosumab       | Rituximab               |
| Ciprofloxacin   | Oseltamivir      | Dexamethasone   | Romidepsin              |
| Citalopram      | Ouabain          | Dexrazoxane     | Rucaparib               |
| Clarithromycin  | Oxcarbazepine    | Dinutuximab     | Ruxolitinib             |
| Clemastine      | Pamidronic acid  | Duvelisib       | Sacituzumab             |
| Clioquinol      | Pantoprazole     | Edotreotide     | Selinexor               |
| Clodronic acid  | Parecoxib        | Elotuzumab      | Selpercatini            |
| Clofazimine     | Paricalcitol     | Emapalumab      | Sipuleucel-T            |
| Clofoctol       | Paroxetine       | Enasidenib      | Sonidegib               |
| Clomifene       | Penfluridol      | Encorafenib     | Sorafenib               |
| Clomipramine    | Pentamidine      | Entrectinib     | Streptozocin            |
| Clopidogrel     | Pentoxifylline   | Enzalutamide    | Sunitinib               |
| Clotrimazole    | Perphenazine     | Erdafitinib     | Tafasitamab             |
| Colchicine      | Phenelzine       | Eribulin        | Tagraxofusp             |
| Cyproheptadine  | Phenoxybenzamine | Erlotinib       | Talazoparib             |
|                 |                  |                 | Talimogene              |
| Dalteparin      | Phentolamine     | Estramustine    | Laherparepvec           |
| Danazol         | Phenylbutyrate   | Etoposide       | Tamoxifen               |
| Dapsone         | Phenytoin        | Everolimus      | Tazemetostat            |
| Deferasirox     | Pimozide         | Exemestane      | Temoporfin              |
| Deferiprone     | Pioglitazone     | Fedratinib      | Temozolomide            |
| Deferoxamine    | Pirfenidone      | Fludarabine     | Temsirolimus            |
| Desmopressin    | Piroxicam        | Fluoxymesterone | Thalidomide             |
| Diazoxide       | Plerixafor       | Flutamide       | Thiotepa                |
| Diclofenac      | Posaconazole     | Fosfestrol      | Tioguanine              |
| Diflunisal      | Pravastatin      | Fotemustine     | Tisagenlecleucel        |
| Digoxin         | Prazosin         | Fulvestrant     | Tivozanib               |

|                    |                       |                      |                       |
|--------------------|-----------------------|----------------------|-----------------------|
| Digoxin            | Prochlorperazine      | Gefitinib            | Toremifene            |
| Dimethyl fumarate  | Promethazine          | Gemtuzumab           | Tositumomab           |
| Dipyridamole       | Propafenone           | Gilteritinib         | Trabectedin           |
| Disulfiram         | Propranolol           | Glasdegib            | Trametinib            |
| Donepezil          | Pyridoxine            | Goserelin            | Trastuzumab           |
|                    |                       | Histamine            | Trastuzumab           |
| Doxazosin          | Pyrimethamine         | dihydrochloride      | Deruxtecan            |
| Doxycycline        | Pyrvinium pamoate     | Histrelin            | Trastuzumab emtansine |
| Dronedarone        | Quetiapine            | Ibritumomab tiuxetan | Tretinoin             |
| Dutasteride        | Rabeprazole           | Ibrutinib            | Trifluridine          |
| Ebastine           | Ranitidine            | Idelalisib           | Triptorelin           |
| Efavirenz          | Ranolazine            | Imatinib             | Trofosfamide          |
| Eflornithine       | Repaglinide           | Imiquimod            | Tucatinib             |
| Emetine            | Reserpine             | Inotuzumab           | Vandetanib            |
| Enalapril          | Ribavirin             | Interferon alfa-2b   | Vemurafenib           |
| Enoxaparin         | Rifabutin             | Iobenguane           | Venetoclax            |
| Epalrestat         | Rifampicin            | Ipilimumab           | Vismodegib            |
| Esomeprazole       | Riluzole              | Isatuximab           | Vorinostat            |
| Ethacrynic acid    | Risedronic acid       | Ivosidenib           | Zanubrutinib          |
| Etodolac           | Risperidone           | Ixabepilone          |                       |
| Etoricoxib         | Ritonavir             |                      |                       |
| Famotidine         | Roflumilast           |                      |                       |
| Fasudil            | Rosuvastatin          |                      |                       |
| Felodipine         | Roxatidine            |                      |                       |
| Fenofibrate        | Roxithromycin         |                      |                       |
| Fenoldopam         | Sertraline            |                      |                       |
| Finasteride        | Sildenafil            |                      |                       |
| Fingolimod         | Simvastatin           |                      |                       |
| Flubendazole       | Sirolimus             |                      |                       |
| Flucytosine        | Sodium aurothiomalate |                      |                       |
| Flunarizine        | Sodium bicarbonate    |                      |                       |
| Fluoxetine         | Spiro lactone         |                      |                       |
| Fluphenazine       | Sulfasalazine         |                      |                       |
| Flurbiprofen       | Sulindac              |                      |                       |
| Fluspirilene       | Suramin               |                      |                       |
| Fluvastatin        | Tacalcitol            |                      |                       |
| Fluvoxamine        | Tadalafil             |                      |                       |
| Ganciclovir        | Telmisartan           |                      |                       |
| Glibenclamide      | Terbinafine           |                      |                       |
| Glipizide          | Teriflunomide         |                      |                       |
| Griseofulvin       | Thiabendazole         |                      |                       |
| Haloperidol        | Thioridazine          |                      |                       |
| Hydralazine        | Ticagrelor            |                      |                       |
| Hydroxychloroquine | Ticlopidine           |                      |                       |
| Hymecromone        | Tigecycline           |                      |                       |
| Ibandronic acid    | Timolol               |                      |                       |
| Ibudilast          | Tinzaparin            |                      |                       |
| Ibuprofen          | Tioconazole           |                      |                       |

|                |                      |  |  |
|----------------|----------------------|--|--|
| Idebenone      | Tocilizumab          |  |  |
| Imipramine     | Tofacitinib          |  |  |
| Indomethacin   | Tolfenamic acid      |  |  |
| Irbesartan     | Topiramate           |  |  |
| Itraconazole   | Tranexamic acid      |  |  |
| Ivermectin     | Tranilast            |  |  |
| Ketamine       | Trazodone            |  |  |
| Ketoconazole   | Triamterene          |  |  |
| Ketoprofen     | Trifluoperazine      |  |  |
| Ketorolac      | Trimetazidine        |  |  |
| Lamotrigine    | Ulinastatin          |  |  |
| Lansoprazole   | Ursodeoxycholic acid |  |  |
| L-Arginine     | Valproic acid        |  |  |
| Leflunomide    | Valsartan            |  |  |
| Levamisole     | Vardenafil           |  |  |
| Levetiracetam  | Verapamil            |  |  |
| Levofloxacin   | Verteporfin          |  |  |
| Levonorgestrel | Warfarin             |  |  |
| L-Glutamine    | Zidovudine           |  |  |
| Lidocaine      | Zileuton             |  |  |
| Liraglutide    | Zoledronic acid      |  |  |
| Lithium        |                      |  |  |

**Table S2:** Table with type of evidence and number of occurrence per drug of drugs that after in depth review were not deemed potential repurposing candidate.

| DRUG                 | number of <i>in vitro</i> results in publications | number of <i>in vivo</i> results in publications | number of human results in publications | number of registered trials in trial databases |
|----------------------|---------------------------------------------------|--------------------------------------------------|-----------------------------------------|------------------------------------------------|
| Abemaciclib          | 1                                                 | 1                                                | 0                                       | 0                                              |
| Acetylsalicylic acid | 4                                                 | 0                                                | 1                                       | 1                                              |
| Ademetionine         | 1                                                 | 0                                                | 0                                       | 0                                              |
| Afatinib             | 1                                                 | 1                                                | 0                                       | 0                                              |
| Alitretinoin         | 4                                                 | 0                                                | 1                                       | 0                                              |
| Allopurinol          | 0                                                 | 0                                                | 1                                       | 0                                              |
| Alpelisib            | 1                                                 | 0                                                | 0                                       | 0                                              |
| Altretamine          | 0                                                 | 0                                                | 2                                       | 0                                              |
| Aminolevulinic acid  | 13                                                | 1                                                | 1                                       | 0                                              |
| Amiodarone           | 1                                                 | 0                                                | 0                                       | 0                                              |
| Amitriptyline        | 1                                                 | 0                                                | 0                                       | 0                                              |
| Amsacrine            | 1                                                 | 0                                                | 1                                       | 0                                              |
| Ascorbic acid        | 4                                                 | 1                                                | 4                                       | 1                                              |
| Auranofin            | 3                                                 | 1                                                | 0                                       | 0                                              |
| Axitinib             | 0                                                 | 0                                                | 0                                       | 1                                              |
| Azacitidine          | 4                                                 | 1                                                | 0                                       | 0                                              |
| BCG vaccine          | 0                                                 | 0                                                | 3                                       | 0                                              |
| Belotecan            | 2                                                 | 1                                                | 1                                       | 1                                              |
| Bosutinib            | 1                                                 | 0                                                | 0                                       | 1                                              |
| Bromocriptine        | 0                                                 | 1                                                | 2                                       | 0                                              |
| Cabozantinib         | 0                                                 | 0                                                | 1                                       | 3                                              |
| Caffeine             | 3                                                 | 0                                                | 1                                       | 0                                              |
| Calcipotriol         | 9                                                 | 1                                                | 2                                       | 0                                              |
| Calcitriol           | 10                                                | 1                                                | 2                                       | 0                                              |
| Candesartan          | 1                                                 | 0                                                | 0                                       | 0                                              |
| Carmofur             | 0                                                 | 0                                                | 2                                       | 0                                              |
| Carmustine           | 3                                                 | 1                                                | 0                                       | 0                                              |
| Celecoxib            | 15                                                | 2                                                | 8                                       | 2                                              |
| Chlorambucil         | 0                                                 | 0                                                | 3                                       | 0                                              |
| Chlormethine         | 2                                                 | 0                                                | 3                                       | 0                                              |
| Chloroquine          | 7                                                 | 0                                                | 0                                       | 0                                              |
| Cholecalciferol      | 10                                                | 0                                                | 2                                       | 0                                              |
| Ciclopirox           | 3                                                 | 0                                                | 0                                       | 0                                              |
| Cladribine           | 1                                                 | 0                                                | 0                                       | 0                                              |
| Clomifene            | 0                                                 | 0                                                | 1                                       | 0                                              |
| Clotrimazole         | 1                                                 | 0                                                | 0                                       | 0                                              |
| Colchicine           | 3                                                 | 2                                                | 0                                       | 0                                              |
| Copanlisib           | 1                                                 | 1                                                | 0                                       | 0                                              |
| Crizotinib           | 2                                                 | 1                                                | 0                                       | 0                                              |
| Cytarabine           | 2                                                 | 1                                                | 1                                       | 0                                              |
| Dactinomycin         | 10                                                | 0                                                | 2                                       | 0                                              |

|                           |    |   |    |   |
|---------------------------|----|---|----|---|
| Danazol                   | 1  | 0 | 0  | 0 |
| Deferiprone               | 2  | 1 | 0  | 0 |
| Denosumab                 | 0  | 0 | 0  | 0 |
| Dexamethasone             | 23 | 1 | 0  | 0 |
| Digoxin                   | 3  | 0 | 0  | 0 |
| Dipyridamole              | 2  | 1 | 0  | 0 |
| Disulfiram                | 1  | 0 | 0  | 0 |
| Eflornithine              | 1  | 0 | 0  | 0 |
| Emetine                   | 6  | 0 | 0  | 0 |
| Eribulin                  | 0  | 0 | 0  | 1 |
| Esomeprazole              | 1  | 0 | 0  | 0 |
| Estramustine              | 1  | 0 | 0  | 0 |
| Etoposide                 | 30 | 4 | 42 | 2 |
| Fingolimod                | 1  | 1 | 0  | 0 |
| Fludarabine               | 0  | 0 | 2  | 1 |
| Fluoxetine                | 1  | 0 | 0  | 0 |
| Flurbiprofen              | 1  | 1 | 0  | 0 |
| Flutamide                 | 2  | 0 | 0  | 0 |
| Fluvastatin               | 1  | 0 | 0  | 0 |
| Histamine dihydrochloride | 2  | 0 | 0  | 0 |
| Hydroxychloroquine        | 1  | 0 | 0  | 0 |
| Ibuprofen                 | 0  | 0 | 1  | 0 |
| Imatinib                  | 4  | 1 | 1  | 0 |
| Imiquimod                 | 7  | 3 | 0  | 1 |
| Indomethacin              | 4  | 2 | 2  | 0 |
| Itraconazole              | 4  | 1 | 0  | 0 |
| Ivermectin                | 1  | 0 | 0  | 0 |
| Ixabepilone               | 0  | 0 | 2  | 1 |
| Lanreotide                | 2  | 2 | 0  | 0 |
| Lansoprazole              | 0  | 0 | 1  | 1 |
| Lapatinib                 | 1  | 1 | 2  | 2 |
| Lenvatinib                | 0  | 0 | 0  | 1 |
| Letrozole                 | 0  | 0 | 0  | 1 |
| Levamisole                | 0  | 0 | 3  | 0 |
| Lidocaine                 | 0  | 0 | 2  | 0 |
| Lithium                   | 1  | 1 | 0  | 0 |
| Lomustine                 | 0  | 0 | 4  | 0 |
| Lopinavir                 | 4  | 1 | 1  | 0 |
| Medroxyprogesterone       | 4  | 2 | 0  | 0 |
| Mefloquine                | 1  | 0 | 0  | 0 |
| Megestrol                 | 0  | 0 | 1  | 0 |
| Melphalan                 | 2  | 0 | 0  | 0 |
| Mepacrine                 | 1  | 0 | 0  | 0 |
| Mepyramine                | 1  | 0 | 0  | 0 |
| Methazolamide             | 0  | 0 | 0  | 1 |
| Methylene blue            | 1  | 0 | 0  | 0 |

|                        |    |   |   |   |
|------------------------|----|---|---|---|
| Metronidazole          | 0  | 0 | 0 | 1 |
| Mitoxantrone           | 0  | 0 | 2 | 0 |
| Neratinib              | 1  | 1 | 1 | 0 |
| Nintedanib             | 0  | 0 | 0 | 3 |
| Olmesartan             | 2  | 0 | 0 | 0 |
| Omega 3                | 7  | 0 | 1 | 1 |
| Omeprazole             | 1  | 0 | 0 | 0 |
| Ormeloxifene           | 1  | 1 | 0 | 0 |
| Panitumumab            | 0  | 0 | 0 | 1 |
| Palbociclib            | 1  | 0 | 0 | 0 |
| Panobinostat           | 2  | 0 | 0 | 0 |
| Parecoxib              | 0  | 0 | 1 | 0 |
| Pentoxifylline         | 4  | 0 | 1 | 0 |
| Phenylbutyrate         | 2  | 0 | 0 | 0 |
| Pioglitazone           | 1  | 1 | 0 | 0 |
| Plicamycin             | 3  | 1 | 0 | 0 |
| Pravastatin            | 1  | 0 | 0 | 0 |
| Propranolol            | 1  | 0 | 0 | 0 |
| Rifampicin             | 1  | 0 | 0 | 0 |
| Ritonavir              | 2  | 1 | 0 | 0 |
| Selinexor              | 0  | 0 | 0 | 2 |
| Simvastatin            | 2  | 0 | 0 | 0 |
| Sirolimus              | 8  | 3 | 2 | 0 |
| Sorafenib              | 2  | 2 | 1 | 1 |
| Streptozocin           | 1  | 0 | 0 | 0 |
| Sulindac               | 6  | 1 | 0 | 0 |
| Sunitinib              | 3  | 2 | 1 | 1 |
| Talazoparib            | 1  | 0 | 0 | 1 |
| Tamoxifen              | 9  | 0 | 2 | 1 |
| Temoporfin             | 2  | 0 | 1 | 0 |
| Temsirolimus           | 1  | 0 | 2 | 3 |
| Thalidomide            | 1  | 1 | 0 | 0 |
| Thioridazine           | 3  | 0 | 1 | 0 |
| Thiotepa               | 0  | 0 | 1 | 0 |
| Tigecycline            | 1  | 1 | 0 | 0 |
| Tocilizumab            | 1  | 1 | 0 | 0 |
| Tolfenamic acid        | 1  | 1 | 0 | 0 |
| Trametinib             | 1  | 0 | 1 | 0 |
| Trastuzumab            | 6  | 2 | 0 | 2 |
| Trastuzumab deruxtecan | 0  | 0 | 0 | 1 |
| Trazodone              | 0  | 0 | 1 | 0 |
| Tretinoin              | 48 | 2 | 8 | 3 |
| Tucatinib              | 0  | 0 | 0 | 1 |
| Ulinastatin            | 0  | 0 | 2 | 0 |
| Ursodeoxycholic acid   | 1  | 0 | 1 | 0 |
| Valsartan              | 1  | 0 | 0 | 0 |

|            |    |   |   |   |
|------------|----|---|---|---|
| Verapamil  | 1  | 0 | 0 | 0 |
| Vorinostat | 11 | 5 | 0 | 1 |
| Zidovudine | 1  | 0 | 0 | 0 |
